# Supplementary material
Source: PubMed Central journal article supplement (PMC7053533)
Supplement: NIHMS1053735-supplement-S1-S4.pdf [file NIHMS1053735-supplement-S1-S4.pdf]

**Supplementary Material**

**Frontal theta and posterior alpha in resting EEG:**

**A critical examination of convergent and discriminant validity**

Ezra E. Smith, Craig E. Tenke, Patricia J. Deldin, Madhukar H. Trivedi,  
Myrna M. Weissman, Randy P. Auerbach, Gerard E. Bruder, Diego A. Pizzagalli,  
Jürgen Kayser\*

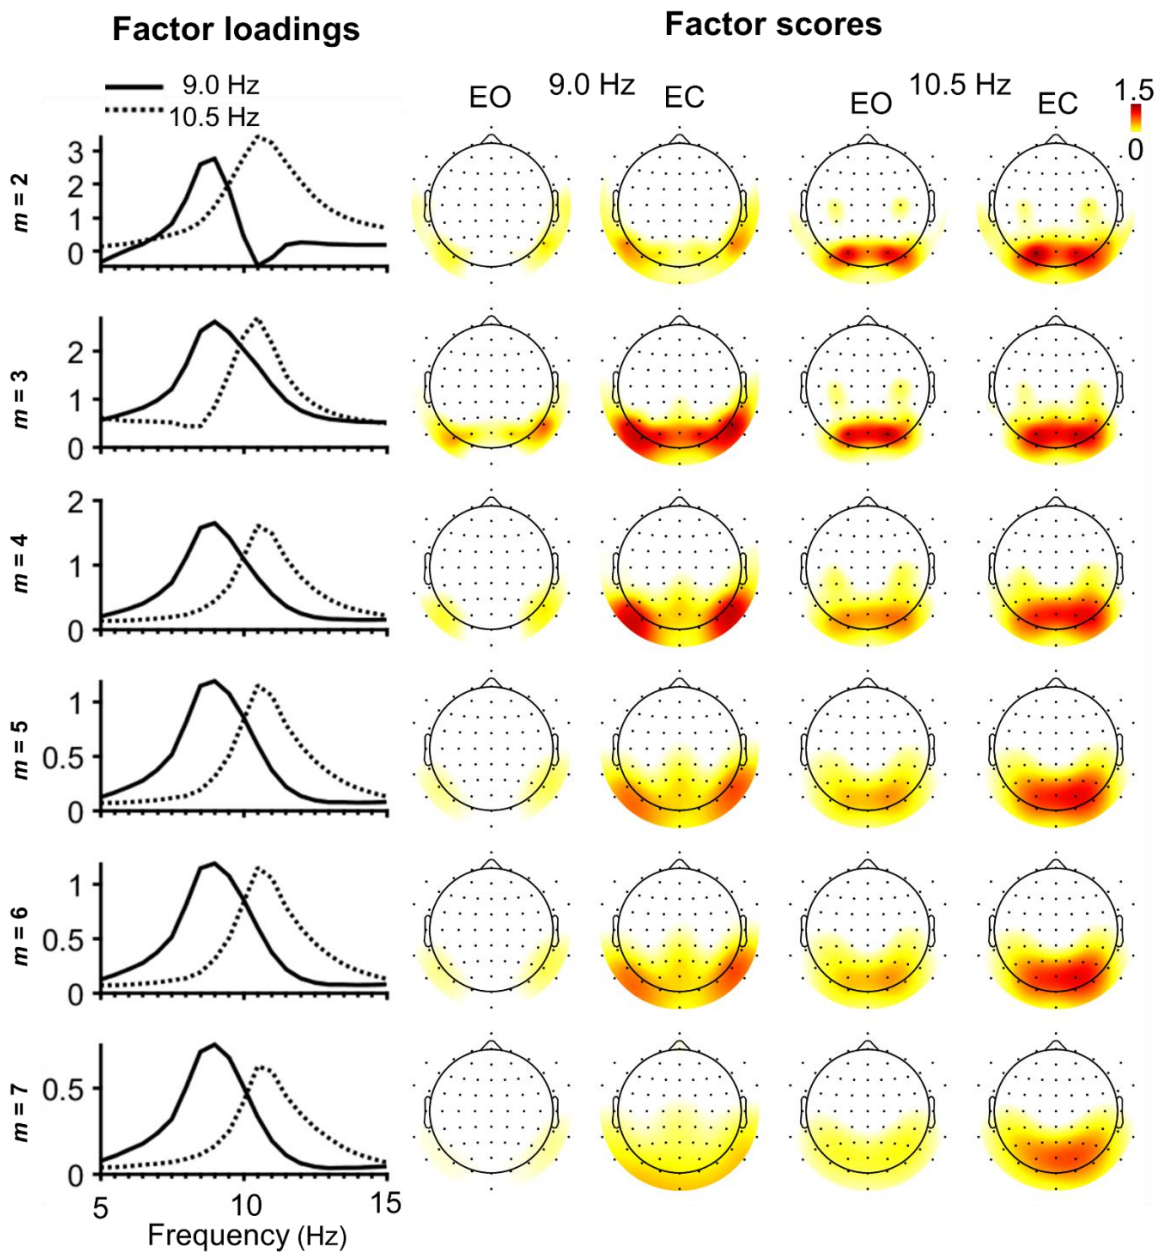

**Figure S1:** Consistency in alpha factor loadings (left panel) and scores (i.e. topographies; right panel) across different CSD spline flexibilities (constants  $m$ ; see Kayser & Tenke, 2015b; Tenke & Kayser, 2012). In general, factor loadings were highly comparable regardless of spline flexibility, except for the most flexible splines ( $m = 2$ ). Tucker congruence coefficients confirmed that CSD-fPCA component loadings were highly similar for  $m$  ranging 3 to 7 (all  $\phi > .90$ ; Lorenzo-Seva & Ten Berge, 2006). Topographies varied as expected with differences in spline flexibility (i.e., more focal with more flexible splines; Kayser & Tenke, 2015), but generally demonstrated a similar topography for the two alpha components, with 9 Hz components having lateral-occipital maxima, whereas 10.5 Hz components revealing more medial parietal-occipital maxima.

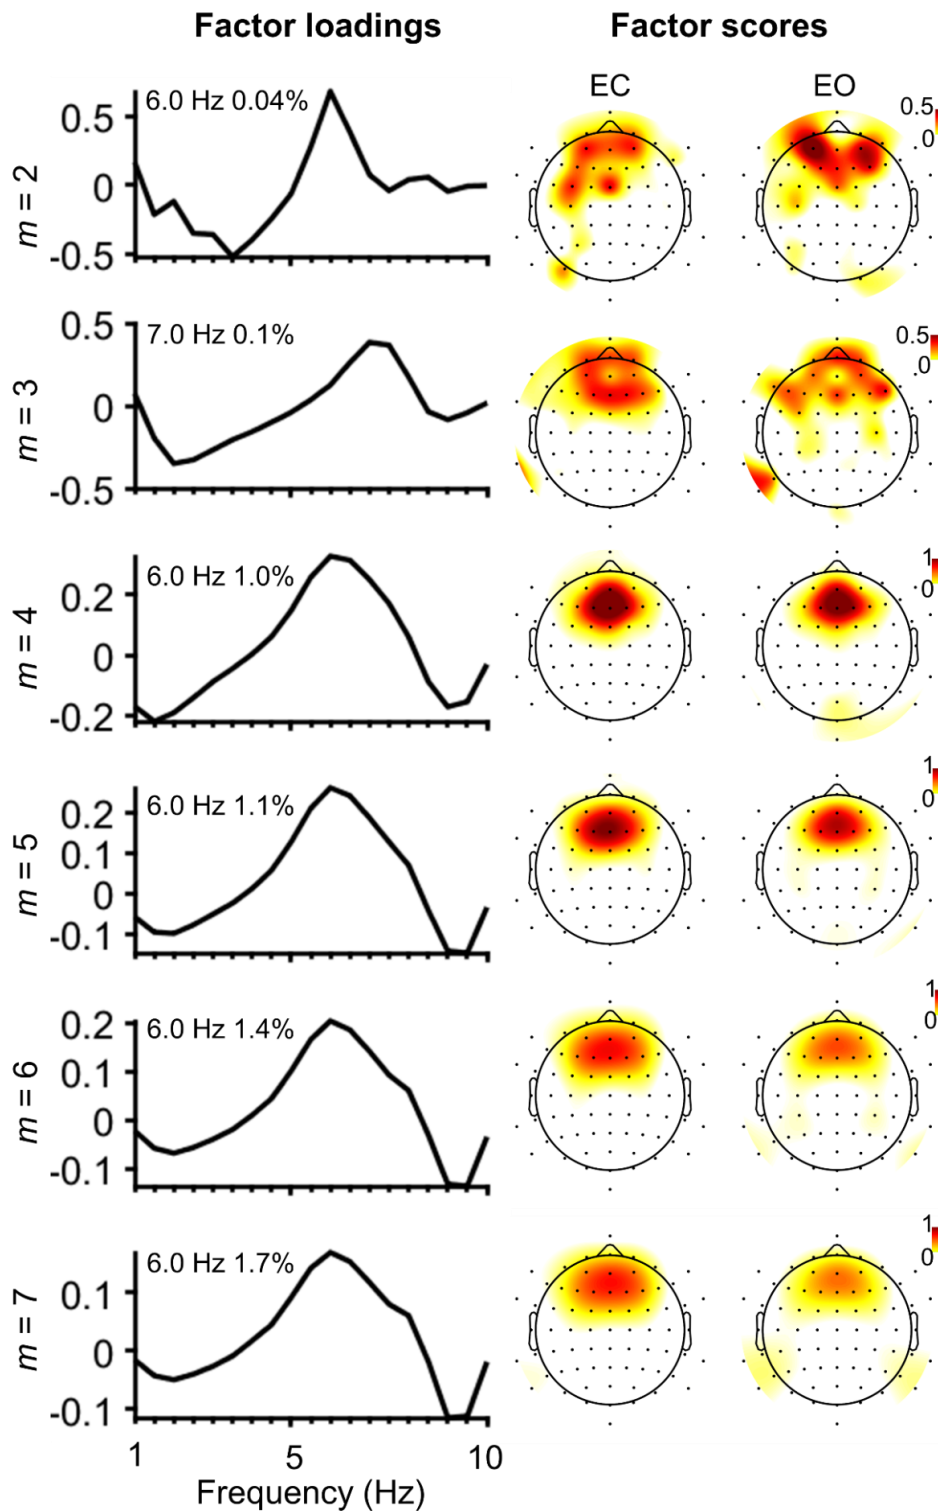

**Figure S2:** Consistency in theta factor loadings (left panel) and scores (topographies; right panel) across different CSD spline flexibilities ( $m = 2$  to  $7$ ; see Figure S1). In general, component loadings were similar across different spline flexibilities. The corresponding theta topographies varied as expected with  $m$ , but generally demonstrated the typical midfrontal theta topography as described in previous work (Cavanagh & Shackman, 2015; Schacter, 1977).

### LORETA w 13 voxels

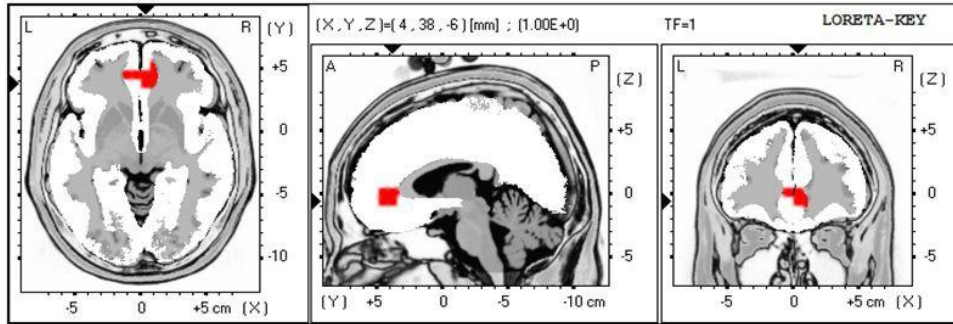

### eLORETA w 39 voxels @ ROI [±5 40 -5]

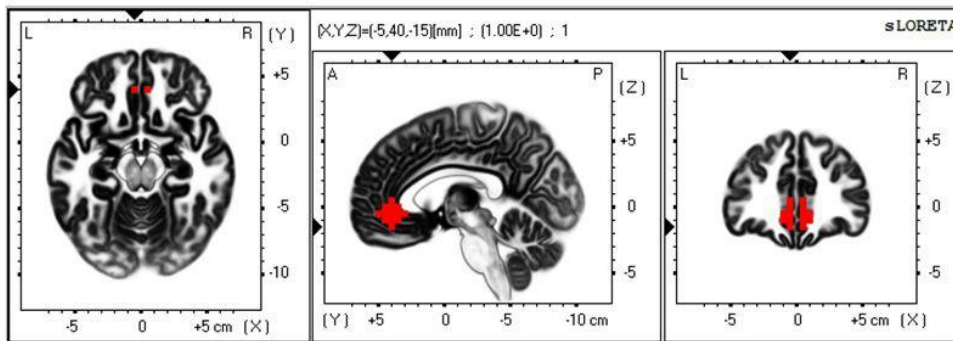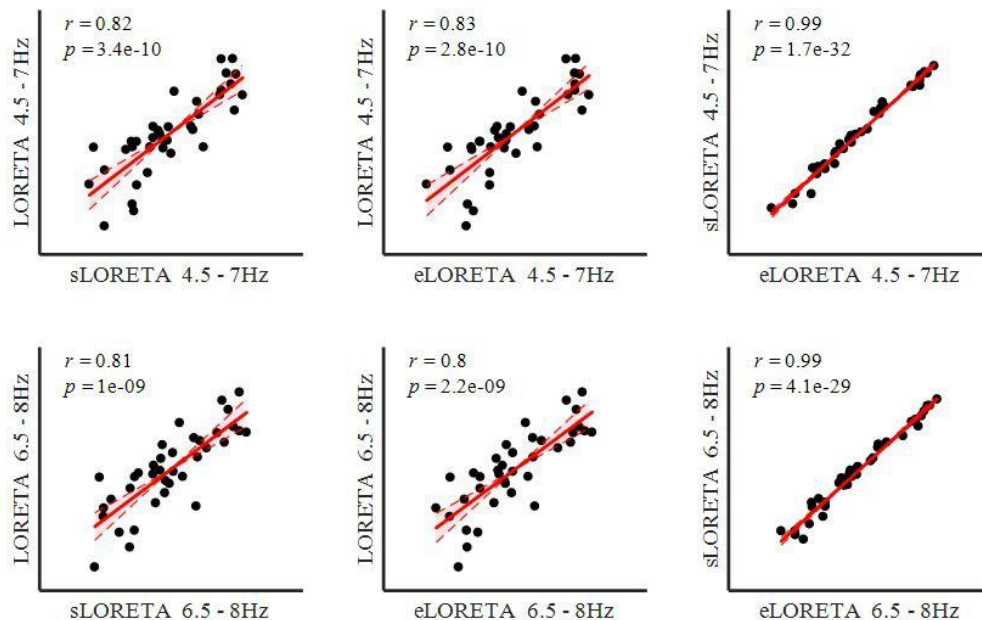

**Figure S3:** Similarities and differences between theta measured with LORETA, sLORETA, and eLORETA. The top two panels show the location of the rACC ROI for the original LORETA-KEY software (LORETA; 2394 voxels total) used by Pizzagalli and others (2001, 2018) and later implementations of standardized and exact LORETA (eLORETA; 6239 voxels total). The original ROI template (13 rACC voxels) was updated to the newer brain template (39 rACC voxels). Scatter plots show the correlation between different LORETA versions for a narrow theta band (6.5 to 8.0 Hz), and a more conventional theta band (4.5 to 7.0 Hz). In all cases, there was close agreement (all  $r$ s > .8) between different versions of LORETA, frequency band limits, and ROI.

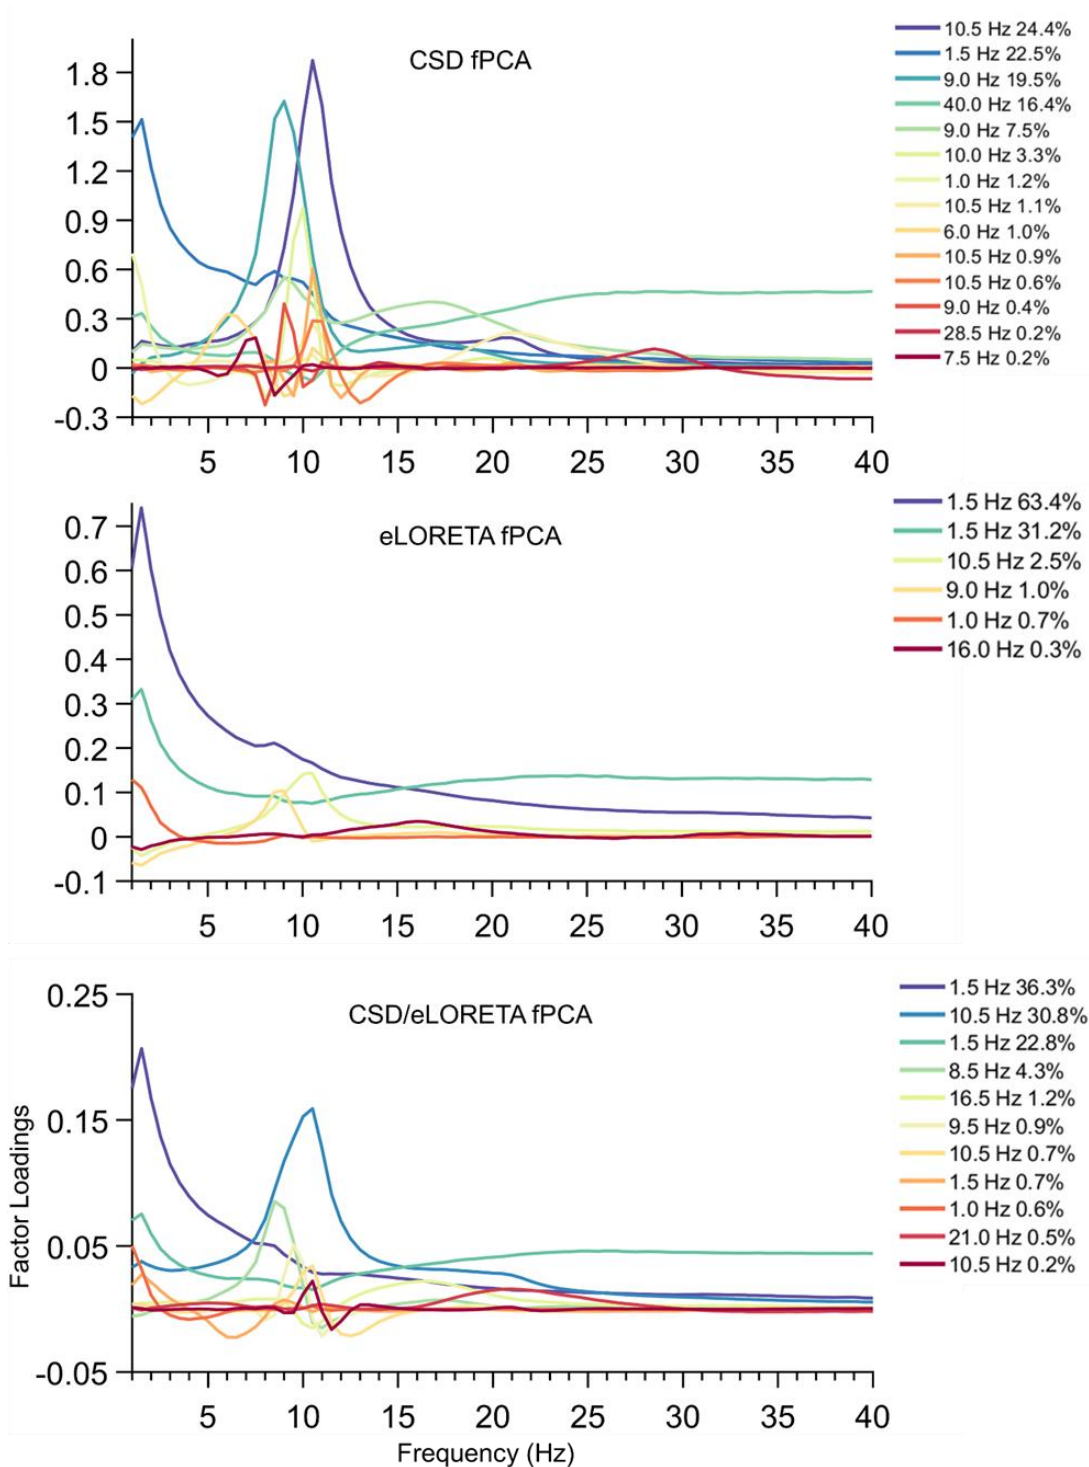

**Figure S4:** fPCA solutions for CSD, eLORETA, and combined CSD/eLORETA data sets, showing factor loadings that together accounted for at least 99% of spectral variance. There were two large factors with peak loadings in the alpha band (also see Figure S1) and expected topographies for each solution, but only the CSD-fPCA solution had a theta factor that contributed to the first 99% of variance. Theta components for eLORETA-fPCA and combined CSD/eLORETA-fPCA were only observed after expanding the search to 99.9% of variance. Peak frequencies of factor loadings varied slightly across solutions. Although there were other low-variance components with peak loadings in the alpha range, these components also included secondary and/or inverse loadings for other frequency ranges and were not considered further.
